1 **Title: Lifeless *Clostridia* stimulate methanogenesis on Fe<sup>0</sup> in an urban**  
2 **lake corrosive community**

3 **Authors:** Paola Andrea Palacios<sup>1</sup> and Amelia-Elena Rotaru<sup>1\*</sup>

4 **Affiliation:** <sup>1</sup>Nordcee, University of Southern Denmark, Odense, Denmark

5 \* **Correspondence:** [arotaru@biology.sdu.dk](mailto:arotaru@biology.sdu.dk)

6 **Running title:** Lifeless *Clostridia* stimulate methanogenesis on Fe<sup>0</sup>

7 **Keywords:** microbial influenced corrosion; iron corrosion; Fe<sup>0</sup>; *Clostridium*; acetogen; acetogenesis; [FeFe]-  
8 hydrogenases; *Methanosarcina*; *Methanotrix*/*Methanosaeta*; *Methanothermobacter*; methanogen;  
9 methanogenesis

# Abstract

Urban environments are webbed with iron-steel structures above and belowground. Underground, in non-sulfidic environments, it has been suggested that interspecies interactions cause Fe<sup>0</sup> corrosion. Particularly, *Methanosarcinales* were assumed to interact syntrophically with acetogenic bacteria during Fe<sup>0</sup> corrosion. Here we challenge this assumption and show that a community of methanogens (38% *Methanosarcinales*) prospers on Fe<sup>0</sup> especially after the demise of the acetogens. Acetogens were mainly represented by *Clostridium* (81% of *Bacteria*). Methanogens were however more diverse including *Methanosarcina* (22% of *Archaea*), *Methanosaeta* (17% of *Archaea*) and *Methanothermobacter* (22% of *Archaea*) as key groups. Surprisingly, acetogens started using electrons from Fe<sup>0</sup> immediately, unchallenged by competing methanogens. Acetogens were expected to be outcompeted by energy efficient methanogens with comparatively lower H<sub>2</sub>-uptake thresholds. However, acetogens prevailed, perhaps because in contrast to methanogens they contain [FeFe]-hydrogenases (encoded in the lake-*Clostridia* metagenome). [FeFe]-hydrogenases from *Clostridium* were previously shown effective at retrieving electrons from Fe<sup>0</sup> for proton reduction. When acetogens thrived, methanogenic rates were low (25.2±8 µM/day) but increased appreciably (62.5±5 µM/day) when acetogens collapsed. Acetate could not explain more than a third of the observed methanogenic rates. The remaining methane could be explained by methanogens reducing their energy expenses while exploiting *Clostridium* remains such as readily fixed nitrogen and/or exuded [FeFe]-hydrogenases producing H<sub>2</sub> on Fe<sup>0</sup>. This has implications on our understanding of viable interactions between autotrophic species retrieving electrons from Fe<sup>0</sup> or other insoluble electron donors.

# Implications

Corrosion damages to underground iron-structures distress both the local environment and the economy. Here we studied an urban lake community corroding Fe<sup>0</sup>. The corrosive community was dominated by *Clostridium* and *Methanosarcinales*, which sequentially produced first more acetate and later methane. Here we bring evidence for an unusual interaction mechanism on Fe<sup>0</sup>, showing that methanogenesis is enhanced by inactive acetogens. Alone, the *Clostridium*-acetogens discovered in this study, could retrieve electrons from Fe<sup>0</sup> effectively, which makes them a good candidate for electrosynthesis of fossil-fuels' alternatives - a future biotechnological application.

## INTRODUCTION

Steel infrastructure extends for billions of kilometers below ground enabling transport and storage of clean water, chemicals, fuels, sewage, but also protection for telecommunication and electricity cables. Deep underground, under anoxic, non-sulfidic conditions, steel was expected to persist unharmed for centuries (1-3). And yet, under such conditions, certain groups of anaerobes (methanogens and acetogens) strip electrons off Fe<sup>0</sup> leading to microbial induced corrosion (MIC) (4-8). Damages induced by MIC in the underground are often discovered too late, leading to environmental and economic devastation. Thus, it is important to be able to predict the lifespan of the material if exposed to microbial communities native to the site where steel structures are located. This would lead to effective replacement strategies and recuperation of the metal prior to accidental spills that may be detrimental to the surrounding environment (1-3).

MIC in non-sulfidic environments is often linked to the presence of acetogens like *Clostridium* and methanogens like *Methanosarcinales* on the surface of the corroded steel structure (4-9). It has been suggested that *Methanosarcinales* were growing in a mutualistic relationship with the acetogens, and allegedly both groups were gaining from the interaction (7, 8). This assumption was based on acetogens producing acetate, which would be then consumed by acetotrophic *Methanosarcinales* methanogens. Concurrently, acetogens were expected to be favored by the removal of their metabolic product - acetate. However, apart from establishing a mutualistic interaction on Fe<sup>0</sup>, acetogens and methanogens may be interacting in two other ways: 1) by competing and 2) by establishing a succession to maximize access to electrons from Fe<sup>0</sup> for reduction of CO<sub>2</sub> to acetate (acetogens; reaction 1) or methane (methanogens; reaction 2).

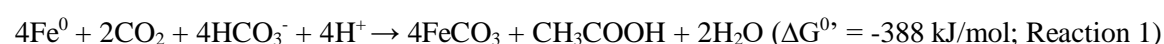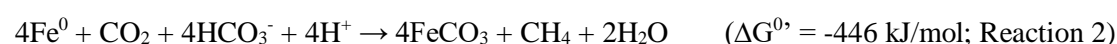

Theoretically, under standard thermodynamic conditions, methanogens should have an advantage over acetogens when provided with Fe<sup>0</sup> as sole electron donor (Reactions 1 & 2). Especially, since methanogens, unlike acetogens, are more effective at retrieving abiotic H<sub>2</sub> (formed on Fe<sup>0</sup>) due to their low H<sub>2</sub>-uptake thresholds (10, 11). Several groups of methanogens could corrode Fe<sup>0</sup> independent of acetogenic bacteria, including species of *Methanosarcina* (12-14), *Methanobacterium* (14-16) and *Methanococcus* (6, 13, 14, 17). The mechanism by which methanogens corrode Fe<sup>0</sup>, has been debated and includes reports which suggest they retrieve abiotic-H<sub>2</sub> off the Fe<sup>0</sup> surface (12), retrieve electrons directly using an unknown electron-uptake mechanism (15, 18) or use extracellular enzymes, which stimulate enzymatic H<sub>2</sub>-evolution on the Fe<sup>0</sup>-surface (17). The later mechanism was especially relevant for *Methanococcus* species which harbored an unstable

genomic island encoding [NiFe]-hydrogenases and formate dehydrogenases enzymes additional to those already encoded by their standard genome (19).

And yet, oftentimes acetogens dominate corrosive communities, outcompeting methanogens when concentrations of H<sub>2</sub> are high and temperatures are low, presumably due to the higher kinetics ( $V_{\max}$ ) of their hydrogenases (10). Moreover, unlike methanogens, acetogens contain [FeFe]-hydrogenases (20), which could retrieve electrons directly from Fe<sup>0</sup> for proton reduction to H<sub>2</sub> possibly (21-23).

In this study, we were interested to understand the dynamics of acetogens and methanogens in an urban area where pipelines for infrastructure are buried underground. We studied corrosion of Fe<sup>0</sup> by an urban lake community from nearby a construction site, on the island of Fyn, Denmark. Alike our previous findings in a coastal-sea environment (24), the corroding microbial community was dominated by *Clostridium* and *Methanosarcinales*. We used a combination of physiological experiments, process inhibition and whole metagenomic analyses to study the interactions of acetogens and methanogens during Fe<sup>0</sup> corrosion. In contrast to our previous report on a corrosive coastal community (24), the acetogens and methanogens in this lake did not compete for retrieval of electrons from Fe<sup>0</sup>, instead methanogens appeared to take advantage of metabolites and enzymes released by lifeless acetogens.

## RESULTS AND DISCUSSION

Methanogens, attached to corroded structures, were assumed to be indirectly involved in corrosion of Fe<sup>0</sup> (7, 8). Here we show that methanogens from an urban lake may corrode Fe<sup>0</sup> alone, as effectively as a complex community of acetogens and methanogens together. However, within a complex community methanogenesis was stimulated by deactivated, but abundant co-occurring *Clostridium*. We therefore propose an unusual interaction, where methanogens may take advantage of acetogenic proton-reducing enzymes, which are set free during the collapse of the acetogenic community.

### Corrosion under electron acceptor limited conditions

From the anoxic sediments of an urban lake near the university of Southern Denmark (**Fig. 1**), we enriched a methanogenic community for four successive transfers, strictly using Fe<sup>0</sup> as electron donor and CO<sub>2</sub> as sole electron acceptor. Under these conditions, the community was highly corrosive as confirmed by gravimetric and product accumulation analyses. Thus, the community utilized  $9.5 \pm 0.6$  mg Fe<sup>0</sup>, and induced 41% more weight loss than cell-free controls ( $6.7 \pm 0.05$  mg Fe<sup>0</sup>; n=3; p=0.01) (**Fig. 2**). Since CO<sub>2</sub> is the only electron acceptor available, two metabolisms are possible: methane production via CO<sub>2</sub>-reductive methanogenesis (reaction 3) and acetate production via acetogenesis (reaction 4).

97  $\text{CO}_2 + 8\text{e}^- + 8\text{H}^+ \rightarrow \text{CH}_4 + 2\text{H}_2\text{O}$  (reaction 3)

98  $2\text{CO}_2 + 8\text{e}^- + 8\text{H}^+ \rightarrow \text{CH}_3\text{COOH} + 2\text{H}_2\text{O}$  (reaction 4)

99 We determined if either of these processes, methanogenesis or acetogenesis, could be corrosive in isolation.  
100 Bacteria (acetogens) were inhibited with a cocktail of antibiotics (kanamycin and ampicillin), in order to favor  
101 only methanogens. Alone, methanogens were as corrosive ( $9.1 \pm 0.4$  mg  $\text{Fe}^0$ ) as the whole community ( $n=3$ ,  
102  $p=0.35$ ) (**Fig. 2**). Methanogens were inhibited with 2-bromoethanesulfonate (a coenzyme A analogue) in order  
103 to favor only acetogens. To our surprise acetogens were significantly more corrosive alone ( $10.6 \pm 0.4$  mg  $\text{Fe}^0$ ;  
104  $n=3$ ;  $p=0.04$ ) than within a mixed community (**Fig. 2**).

105 To better understand how methanogens and acetogens corroded  $\text{Fe}^0$  we corroborated gravimetric  
106 determinations with electron recoveries in metabolic products and functional metagenomics of the corrosive  
107 community.

## 108 **Electron recoveries exceeded estimated recoveries from abiotic $\text{H}_2$**

109 Electron recoveries revealed that this lake corrosive community does not rely on the abiotic  $\text{H}_2$  chemically  
110 generated at the  $\text{Fe}^0$  surface ( $2\text{e}^- + 2\text{H}^+ \rightarrow \text{H}_2$ ). As such, the community produced 3.3 times more methane ( $3.5$   
111  $\pm 0.1$  mM) than expected ( $1.1 \pm 0.2$  mM) from abiotic  $\text{H}_2$  (**Fig. 3**). Interestingly, within the community,  
112 methanogens started slowly ( $27 \pm 5.7$   $\mu\text{M}/\text{day}$ ), not rivaling highly productive acetogens ( $68 \pm 1.8$   $\mu\text{M}/\text{day}$ ) for  
113 the first month (**Fig. 3**). At the end of the incubation, acetogenesis ceased, whereas methanogens sped up  
114 accomplishing rates of methanogenesis ( $62.5 \pm 5.1$   $\mu\text{M}/\text{day}$ ), twofold above those predicted via acetoclastic  
115 methanogenesis ( $28 \pm 7.3$   $\mu\text{M}/\text{day}$ ):  $\text{CH}_3\text{COOH} \rightarrow \text{CO}_2 + \text{CH}_4$  (**Fig. 3**). Perhaps, methanogens were non-  
116 competitively accessing electrons from  $\text{Fe}^0$  in the absence of the acetogens, during the last month of incubation.  
117 To further address this, we verified the effectiveness of methanogenesis after the eradication of bacteria with  
118 the help of antibiotics. Bearing in mind that methanogens were as corrosive as the mixed community (**Fig. 2**),  
119 we anticipated this would translate in a highly productive methanogenic community once bacteria were  
120 rendered ineffective by antibiotics. To our surprise, methanogens unaccompanied by bacteria produced  
121 significantly less methane ( $1.3 \pm 0.1$  mM) than within the mixed community ( $3.5 \pm 0.1$  mM) (**Fig. 3**). On the  
122 other hand, acetogens accumulated significantly more acetate ( $2.5 \pm 0.05$  mM), than they did within the mixed  
123 community ( $2.0 \pm 0.03$  mM) (**Fig. 3**). However, the mixed community showed overall better electron recoveries  
124 than the summed electron recoveries of unaccompanied acetogens and methanogens put together (**Fig. 3**). We  
125 foresee three different scenarios to why the community was 15% more effective in utilizing  $\text{Fe}^0$  as electron  
126 donor than adding up the corrosive activities of solitary acetogens and solitary methanogens.

**First, the collapse of the acetogens may release useful enzymes for the methanogens.** During the last month of incubation, when the acetogenic population collapsed, we hypothesize that dying acetogens released enzymes (e.g. [FeFe]-hydrogenase), which boost H<sub>2</sub>-production and consequently H<sub>2</sub>-dependent methanogenesis. This supposition is backed by previous reports, which showed that acetogenic [FeFe]-hydrogenases in isolation reduce protons to hydrogen when provided with Fe<sup>0</sup> as electron donor (21-23).

**Secondly, the collapse of the acetogens results in methanogens co-feeding on Fe<sup>0</sup> and acetate.** Alternatively, when acetogens collapse, acetoclastic methanogens may start utilizing the Fe<sup>0</sup> directly, but can only do so after they were provided with enough acetate for biomass synthesis. This supposition is backed by reports that acetoclastic methanogens retrieve electrons from electrogenic bacteria directly or via conductive particles, while also requiring acetate for incorporation into biomass (25, 26). Moreover, many of the strict H<sub>2</sub>-utilizing methanogens, require or are stimulated by acetate (27, 28), likely because it alleviates the need to endogenously produce acetate for biomass synthesis.

**Thirdly, the collapse of the acetogens may lead to fixed N<sub>2</sub> accessible to methanogens corroding Fe<sup>0</sup>.** Methanogens were more effective after the collapse of the acetogenic community, and yet they did require the collapse of the acetogens to achieve the highest methanogenic rates. Some acetogens, including several *Clostridium* species, are effective N<sub>2</sub> fixers (29). N<sub>2</sub> fixation catalyzed by nitrogenase enzymes is an energy demanding process requiring 16 ATPs for one fixed N<sub>2</sub> (30, 31). We hypothesize that the collapse of the acetogens leads to significant release of fixed-dinitrogen, now easily accessible to the methanogens. This supposition was further supported by functional community analyses, which showed a high N<sub>2</sub> fixation capacity within the bacterial community but not the archaea (see below).

Thus, to better understand how acetogens and methanogens interact with each other inducing higher electron recoveries as a community than alone (**Fig. 3**), we examined the functional metagenome of a community residing on Fe<sup>0</sup> for four successive transfers.

## Acetogens

*Clostridium* species (especially ‘*Lachnoclostridium*’ *saccharolyticum*) dominated the corrosive community (81.3% of all bacteria; 81.2% of all prokaryotes; **Fig. 4**) according to whole genome sequence analyses. Most *Clostridium* have never been tested for autotrophic acetogenesis including ‘*L.*’ *sachharolyticum* (32, 33). Nevertheless, we could find the entire Wood Ljungdahl pathway for acetogenesis in its readily available genome (NC\_014376.1). Using metagenome analyses we also reconstructed the Wood Ljungdahl pathway almost in its entirety for our corrosive-*Clostridium*, which carried acetogenesis from Fe<sup>0</sup> and CO<sub>2</sub> (**Fig. 5**). This acetogenic pathway has been intensively studied for biotechnological applications such as microbial

electrosynthesis, where electrodes are provided as electron donor instead of  $\text{Fe}^0$  (34, 35). Our corrosive *Clostridium* was highly effective at generating acetate from  $\text{Fe}^0$  at room temperature with rates (ca.  $84 \mu\text{M/day}$ ; **Fig. 3**) comparable to those observed for various acetogens incubated at higher temperatures on poised electrodes (36) or  $\text{Fe}^0$  (5, 37). Moreover, *Clostridium* acetogens, often associated with corrosion, have been recently reported to corrode  $\text{Fe}^0$  as effectively as sulfate reducers (38).

In our enrichments on  $\text{Fe}^0$ , *Clostridium*-acetogens were faster than the methanogens, initiating and completing their activity two months before the methanogens (**Fig. 2**). Acetogens are faster not because the Wood-Ljungdahl pathway is more energy effective than methanogenesis, as acetogenesis generates less ATPs (0.3 ATPs/acetate; (39)), than  $\text{CO}_2$ -reductive methanogenesis (0.5 ATPs/methane; (40)). Instead, these *Clostridium* acetogens may be quicker at accessing electrons from  $\text{Fe}^0$  because they contain [FeFe] proton-reducing hydrogenases, which are absent in methanogens (20). For example, the proton-reducing [FeFe] hydrogenases from *C. acetobutylicum* corrodes  $\text{Fe}^0$  effectively by drawing electrons for the reaction:  $2\text{H}^+ + 2\text{e}^- \rightarrow \text{H}_2$  (21-23). *Clostridial* [FeFe] hydrogenases are operative at  $\text{H}^+$ -reduction compared to methanogenic [NiFe]-hydrogenases which are rather operative in the opposite direction doing  $\text{H}_2$ -oxidation, but less effective doing proton reduction (20). In the environmental metagenome of these lake-*Clostridia* we did find [FeFe]-hydrogenases (EC. 1.12.7.2 ferredoxin hydrogenase), indicating they have the genetic potential to effectively carry proton-reduction. However, we still do not understand the exact mechanism how this lake *Clostridium* establishes contact with  $\text{Fe}^0$  for successful electron retrieval by the [FeFe]-hydrogenase enzymes.

One possibility is that they retrieve electrons (i) directly via membrane-bound proteins as it has been proposed for *Clostridium ljungdahlii* grown on electrodes (34, 35), or (ii) indirectly by exuding exocellular enzymes like hydrogenases or formate dehydrogenases for effective electron uptake for enzymatic  $\text{H}_2$  production (17, 21-23). However, if enzymes were exocellular they would deliver  $\text{H}_2$  non-specifically for both the *Clostridium*-acetogens and hydrogenotrophic methanogens, resulting in competition for enzymatically-released  $\text{H}_2$ . Then the microorganisms with highest affinity for  $\text{H}_2$  would be favored. Generally, *Clostridium* species have a lower  $\text{H}_2$ -threshold (minimum  $\text{H}_2$ -concentration for growth) compared to most methanogens (41). Thus, if *Clostridium* releases enzymes extracellularly it would not benefit. We therefore propose that during the first phase *Clostridium* is most likely to directly retrieve electrons possibly using membrane bound [FeFe]-hydrogenases rather than expelling these enzymes extracellularly to be used by their competitors - the methanogens (**Fig. 6a**).

## Methanogens

Methanogens were highly diverse comprising both acetoclastic *Methanosarcinales* (ca. 38% of all archaea; including 22% *Methanosarcina* and 16% *Methanosaeta*), as well as hydrogenotrophic groups – mostly



represented by *Methanothermobacter* (ca. 22% of all Archaea) (**Fig. 4**). *Methanothermobacter* species are rarely associated with corroded structures (42) and were shown to be especially corrosive when provided with a partner bacterium (43). On the other hand, *Methanosarcinales* have been often associated with corroded structures (4-9) were capable of utilizing  $\text{Fe}^0$  as electron donor in pure cultures (12-14), but assumed to be indirectly involved in corrosion feeding on acetate delivered by acetogens (7, 8). Here we showed that methanogens alone could indeed corrode  $\text{Fe}^0$  as effectively as a mixed community of acetogens and methanogens (**Fig. 2**).

During the acetogenic period (**Fig. 6**), when *Clostridium* proliferates on  $\text{Fe}^0$  and produces acetate, we expected *Methanosarcinales* to feed on the acetate produced by *Clostridium*. Our data confirmed that during this period acetate explained all the methane produced. Accordingly, when acetogens collapsed, the rate of acetate consumption ( $40.1 \pm 6 \mu\text{M/day}$ ) surpassed that of methanogenesis ( $25.2 \pm 8 \mu\text{M/day}$ ) (**Fig. 3**) likely due to incorporation in the biomass of the methanogens. During this acetogenic period, the survival of hydrogenotrophic groups like *Methanothermobacter* may depend on retrieval of abiotic- $\text{H}_2$  as well as  $\text{H}_2$ -produced by acetoclastic methanogens (44, 45).

During the methanogenic period (**Fig. 6**), when acetogens collapsed and methanogenic rates rose steeply from ca.  $25 \mu\text{M/day}$  to ca.  $63 \mu\text{M/day}$ , methanogens appear to take advantage of inactivated acetogens. Methanogens alone did not produce methane with the same rates (max.  $17 \mu\text{M/day}$ ) as they did together with acetogens (**Fig. 3**). Thus, methanogens appear to require the preceding occurrence of the acetogens. We propose this is due to a combination of factors provided by ‘dying’ *Clostridia* such as: (i) leaked [FeFe]-proton reducing hydrogenases; (ii) available acetate for methanogenic biomass production; and (iii) readily fixed nitrogen. Our proposition was supported by metagenome analyses, which showed the presence of [FeFe]-ferredoxin hydrogenases in the acetogens, and an abundance of *Firmicutes*-nitrogenase genes (86% of the *nifH*, within the entire corrosive community), which were far less abundant in the metagenome of methanogens (0.2% *nifH* from *Methanosarcina*; 0.9% from *Methanosaeta*; and 1.6% in *Methanomicrobia*).

In conclusion, we describe here a novel form of interspecies interaction between acetogenic *Clostridia* and *Methanosarcinales*-methanogens during  $\text{Fe}^0$  corrosion. We observed the interaction between acetogens and methanogens was not limited to acetate-transfer and required the collapse of the acetogens for an advantageous succession of the methanogens.

Thus, during  $\text{Fe}^0$  corrosion, methanogenesis was stimulated by lysed co-occurring *Clostridium* and we provide support for three different scenarios: (i) the collapse of the acetogens releasing enzymes that boost methanogenesis, (ii) acetate contributing to increased biomass production and (iii) the collapse of the acetogens leading to more fixed  $\text{N}_2$  accessible to the methanogens corroding  $\text{Fe}^0$ . Moreover, when acetogens collapse,



methanogens don't have to compete anymore for electrons from  $\text{Fe}^0$ . Thus, the interaction is a form of opportunistic scavenging with methanogens prospering due to the demise of the *Clostridium*.

## MATERIALS AND METHODS

### Sample collection and enrichment culture conditions

Sediment cores were sampled during the month of July 2016 from a small lake located near a construction site on the campus of the University of Southern Denmark (SDU), Odense (**Fig. 1**). The salinity of the lake was 0.6 psu, and gas bubbles (including methane) were continuously released to the water surface while sampling. Sediment cores were sliced in the laboratory, and the depth horizon 15- 20 cm was used for downstream enrichments in a DSM modified 120 media (modifications: 0.6g/L NaCl, without casitone, without sodium acetate, without methanol, and without  $\text{Na}_2\text{S} \times 9\text{H}_2\text{O}$ ). The enrichment cultures were prepared in 50 mL blue butyl-rubber-stoppered glass vials with an anoxic headspace of a  $\text{CO}_2$ :  $\text{N}_2$  gas mix (20:80, v/v). Iron granules (99.98% Thermo Fisher, Germany) or iron coupons (3cm  $\times$  1cm  $\times$  1mm) were the only source of electrons over the course of five successive transfers. All incubations were performed in triplicate.

All enrichments were transferred when methane production reached stationary phase. DNA extractions, SEM analyses, and further experiments were performed at the fourth transfer, after 2 years of enrichment on  $\text{Fe}^0$ . In addition, methanogen-specific coenzyme  $\text{F}_{420}$  auto-fluorescence was monitored via routine microscopy to confirm the presence or absence of methanogens. To evaluate the solitary corrosive potential of methanogens, we blocked all bacteria with an antibiotic cocktail 200  $\mu\text{g/mL}$  of kanamycin and 100  $\mu\text{g/mL}$  of ampicillin as done before (46). To evaluate the solitary corrosive potential of the acetogens, we inhibited all methanogens with 2 mM 2-bromoethanesulfonate (BES) as done before (47).

### Chemical analyses

Methane concentrations were analyzed on a Thermo Scientific Trace 1300 gas chromatograph system coupled to a thermal conductivity detector (TCD). The injector was operated at 150°C and the detector at 200°C with 1.0 mL/min argon as reference gas. The oven temperature was constant at 70°C. Separation was done on a TG-BOND Msieve 5A column (Thermo Scientific; 30-m length, 0.53-mm i.d., and 20- $\mu\text{m}$  film thickness) with argon as carrier gas at a flow of 25 mL/min. The GC was controlled and automated by a Chromeleon software (Dionex, Version 7). On our set-up the limit of detection for  $\text{H}_2$  and  $\text{CH}_4$  was 5  $\mu\text{M}$ .

Acetate production was measured using the Dionex ICS-1500 Ion Chromatography System (ICS-1500) equipped with the AS50 autosampler, and an IonPac AS22 column coupled to a conductivity detector (31 mA).

For separation of volatile fatty acids, we used 4.5 mM Na<sub>2</sub>CO<sub>3</sub> with 1.4 mM NaHCO<sub>3</sub> as eluent. The run was isothermic at 30°C with a flow rate of 1.2mL/min. The limit of detection for acetate was 0.1 mM.

## **DNA purification and metagenomic analyses**

DNA was isolated as previously described before (24), using a combination of two commercially available kits: MasterPure™ Complete DNA and RNA Purification Kit (Epicenter, Madison, WI, USA), and the Fast Prep spin MP<sub>tm</sub> kit for soil (Mobio/QuiaGen, Hildesheim, Germany). DNA quality was verified on an agarose gel, and DNA was quantified on a mySPEC spectrophotometer (VWR®/ Germany). Whole metagenome sequencing was performed on a NovaSeq 6000 system, using an Illumina TrueSeq PCR-free approach via a commercially available service (Macrogen/ Europe). Unassembled DNA sequences were merged, quality checked, and annotated using the Metagenomics Rapid Annotation (MG-RAST) server (v4.03) with default parameters (48). Illumina True Seq sequencing resulted in 3,723,388 high-quality reads of a total of 4,032,354 with an average length of 250 bp. For taxonomic analyses, the metagenomic data was compared with the RefSeq (49) database available on the MG-RAST platform. Of a total of 2,664,384 OTUs, only 391 were not classified in a domain. The rarefaction curve indicated that most of the prokaryotic diversity was covered in our sample. To investigate genes involved in carbon and nitrogen fixation, sequencing reads were annotated against the KEGG Orthology (KO) reference database. Both taxonomic and functional analyses were performed with the following cutoff parameters: *e*-value of 1e-5, a minimum identity of 80%, and a maximum alignment length of 15 bp.

## **Removal of corrosion crust and corrosion rates**

The corrosion crust from the iron coupons was removed with inactivated acid (10% hexamine in 2M HCl) (50). Then, the iron coupons were dried with N<sub>2</sub> gas stream, weighted and anaerobically stored.

## **Scanning electron microscopy**

Fixation of cells on iron coupons was performed anaerobically by adding 2.5% glutaraldehyde in 0.1M phosphate buffer (pH 7.3) and incubating at 4°C for 12 h. The corroded coupons were then washed three times with 0.1 M phosphate buffer at 4°C for 10 min each. Dehydration was accomplished by a series of anoxic pure ethanol steps (each step 10 min; 35%, 50%, 70%, 80%, 90%, 95% and 100% v/v) (51). The coupons were chemical dried with hexamethyldisilazane under a gentle N<sub>2</sub> gas stream. Specimens were stored under N<sub>2</sub> atmosphere and analyzed within 18-24 h at the UMASS electron microscopy facility using the FEI Magellan 400 XHR-SEM with a resolution of 5kV.

## **ACKNOWLEDGMENTS**

This is a contribution to a Sapere Aude Danish Research Council grant to AER with grant number 4181-00203. We would like to thank Oona Snoeyenbos-West, Carolin Löscher, Satoshi Kawaichi and Christian Furbo Christiansen for help with sampling and valuable discussions. We would like to thank Joy Ward for help with preparing samples for scanning electron microscopy and we'd like to recognize the University of Massachusetts electron microscopy facility which provided access and training of PAPJ on the FEI Magellan XHR-SEM.

## REFERENCES

1. Arriba-Rodriguez L-d, Villanueva-Balsera J, Ortega-Fernandez F, Rodriguez-Perez FJM. 2018. Methods to Evaluate Corrosion in Buried Steel Structures: A Review. *Metals* 8:334.
2. Usher K, Kaksonen A, Cole I, Marney D. 2014. Critical review: microbially influenced corrosion of buried carbon steel pipes. *International Biodeterioration & Biodegradation* 93:84-106.
3. Skovhus TL, Eckert RB, Rodrigues E. 2017. Management and control of microbiologically influenced corrosion (MIC) in the oil and gas industry—Overview and a North Sea case study. *Journal of biotechnology* 256:31-45.
4. Mand J, Park HS, Jack TR, Voordouw G. 2014. The role of acetogens in microbially influenced corrosion of steel. *Frontiers in Microbiology* 5.
5. Kato S, Yumoto I, Kamagata Y. 2015. Isolation of acetogenic bacteria that induce biocorrosion by utilizing metallic iron as the sole electron donor. *Applied and Environmental Microbiology* 81:67-73.
6. Mori K, Tsurumaru H, Harayama S. 2010. Iron corrosion activity of anaerobic hydrogen-consuming microorganisms isolated from oil facilities. *Journal of Bioscience and Bioengineering* 110:426-430.
7. Zhang T, Fang H, Ko B. 2003. Methanogen population in a marine biofilm corrosive to mild steel. *Applied Microbiology and Biotechnology* 63:101-106.
8. Mand J, Park HS, Okoro C, Lomans BP, Smith S, Chiejina L, Voordouw G. 2016. Microbial Methane Production Associated with Carbon Steel Corrosion in a Nigerian Oil Field. *Frontiers in Microbiology* 6.
9. Zhu XY, Lubeck J, Kilbane JJ. 2003. Characterization of microbial communities in gas industry pipelines. *Applied and Environmental Microbiology* 69:5354-5363.
10. Kotsyurbenko OR, Glagolev MV, Nozhevnikova AN, Conrad R. 2001. Competition between homoacetogenic bacteria and methanogenic archaea for hydrogen at low temperature. *FEMS Microbiology Ecology* 38:153-159.

- 314 11. Drake HL, Küsel K, Matthies C. 2002. Ecological consequences of the phylogenetic and  
315 physiological diversities of acetogens. *Antonie Van Leeuwenhoek* 81:203-213.
- 316 12. Daniels L, Belay N, Rajagopal BS, Weimer PJ. 1987. Bacterial methanogenesis and growth  
317 from CO<sub>2</sub> with elemental iron as the sole source of electrons. *Science* 237:509-511.
- 318 13. Boopathy R, Daniels L. 1991. Effect of pH on anaerobic mild steel corrosion by  
319 methanogenic bacteria. *Applied and Environmental Microbiology* 57:2104-2108.
- 320 14. Belay N, Daniels L. 1990. Elemental metals as electron sources for biological methane  
321 formation from CO<sub>2</sub>. *Antonie van Leeuwenhoek* 57:1-7.
- 322 15. Dinh HT, Kuever J, Mußmann M, Hassel AW, Stratmann M, Widdel F. 2004. Iron  
323 corrosion by novel anaerobic microorganisms. *Nature* 427:829.
- 324 16. Lorowitz WH, Nagle Jr DP, Tanner R. 1992. Anaerobic oxidation of elemental metals  
325 coupled to methanogenesis by *Methanobacterium thermoautotrophicum*. *Environmental*  
326 *science and technology* 26:1606-1610.
- 327 17. Deutzmann JS, Sahin M, Spormann A. 2015. Extracellular enzymes facilitate electron  
328 uptake in biocorrosion and bioelectrosynthesis. *mBio* 6:e00496-15.
- 329 18. Beese-Vasbender PF, Grote J-P, Garrelfs J, Stratmann M, Mayrhofer KJ. 2015. Selective  
330 microbial electrosynthesis of methane by a pure culture of a marine lithoautotrophic  
331 archaeon. *Bioelectrochemistry* 102:50-55.
- 332 19. Tsurumaru H, Ito N, Mori K, Wakai S, Uchiyama T, Iino T, Hosoyama A, Ataku H,  
333 Nishijima K, Mise M. 2018. An extracellular [NiFe] hydrogenase mediating iron corrosion  
334 is encoded in a genetically unstable genomic island in *Methanococcus maripaludis*.  
335 *Scientific Reports* 8:15149.
- 336 20. Peters JW, Schut GJ, Boyd ES, Mulder DW, Shepard EM, Broderick JB, King PW, Adams  
337 M. 2015. [FeFe]- and [NiFe]-hydrogenase diversity, mechanism, and maturation. *Biochimica*  
338 *et Biophysica Acta* 1853:1350-1369.
- 339 21. Mehanna M, Basseguy R, Delia M-L, Girbal L, Demuez M, Bergel A. 2008. New  
340 hypotheses for hydrogenase implication in the corrosion of mild steel. *Electrochimica Acta*  
341 54:140-147.
- 342 22. Rouvre I, Basseguy R. 2016. Exacerbation of the mild steel corrosion process by direct  
343 electron transfer between [Fe-Fe]-hydrogenase and material surface. *Corrosion Science*  
344 111:199-211.
- 345 23. Mehanna M, Rouvre I, Delia M-L, Féron D, Bergel A, Basséguy R. 2016. Discerning  
346 different and opposite effects of hydrogenase on the corrosion of mild steel in the presence  
347 of phosphate species. *Bioelectrochemistry* 111:31-40.

- 348 24. Jaramillo PAP, Snoeyenbos-West O, Loescher C, Thamdrup B, Rotaru A-E. 2019. Baltic  
349 Methanosarcina and Clostridium compete for electrons from metallic iron. Biorxiv  
350 530386:530386.
- 351 25. Rotaru A-E, Shrestha PM, Liu F, Markovaite B, Chen S, Nevin KP, Lovley DR. 2014.  
352 Direct interspecies electron transfer between Geobacter metallireducens and Methanosarcina  
353 barkeri. Applied and Environmental Microbiology 80:4599-4605.
- 354 26. Rotaru A-E, Shrestha PM, Liu F, Shrestha M, Shrestha D, Embree M, Zengler K, Wardman  
355 C, Nevin KP, Lovley DR. 2014. A new model for electron flow during anaerobic digestion:  
356 direct interspecies electron transfer to Methanosaeta for the reduction of carbon dioxide to  
357 methane. Energy and Environmental Science 7:408-415.
- 358 27. Jetten MS, Stams AJ, Zehnder A. 1990. Acetate threshold values and acetate activating  
359 enzymes in methanogenic bacteria. FEMS Microbiology Ecology 6:339-344.
- 360 28. Whitman WB, Bowen TL, Boone DR. 2014. The Methanogenic Bacteria, p 123-163. *In*  
361 Rosenberg E, DeLong EF, Lory S, Stackebrandt E, Thompson F (ed), The Prokaryotes:  
362 Other Major Lineages of Bacteria and The Archaea doi:10.1007/978-3-642-38954-2\_407.  
363 Springer Berlin Heidelberg, Berlin, Heidelberg.
- 364 29. Chen J-S. 2004. Nitrogen fixation in the Clostridia, p 53-64, Genetics and regulation of  
365 nitrogen fixation in free-living bacteria. Springer.
- 366 30. Raymond J, Siefert JL, Staples CR, Blankenship R. 2004. The natural history of nitrogen  
367 fixation. Molecular biology and evolution 21:541-554.
- 368 31. Simpson FB, Burris R. 1984. A nitrogen pressure of 50 atmospheres does not prevent  
369 evolution of hydrogen by nitrogenase. Science 224:1095-1097.
- 370 32. Murray W, Khan A. 1982. Clostridium saccharolyticum sp. nov., a saccharolytic species  
371 from sewage sludge. International Journal of Systematic and Evolutionary Microbiology  
372 32:132-135.
- 373 33. Hosny M, Abdallah RA, Khalil JB, Fontanini A, Baptiste E, Armstrong N, La Scola B.  
374 2019. Clostridium pacaense: a new species within the genus Clostridium. New Microbes  
375 and New Infections 28:6-10.
- 376 34. Nevin KP, Hensley SA, Franks AE, Summers ZM, Ou J, Woodard TL, Snoeyenbos-West  
377 OL, Lovley DR. 2011. Electrosynthesis of organic compounds from carbon dioxide is  
378 catalyzed by a diversity of acetogenic microorganisms. Applied and Environmental  
379 Microbiology 77:2882-2886.
- 380 35. Nevin KP, Woodard TL, Franks AE, Summers ZM, Lovley DR. 2010. Microbial  
381 electrosynthesis: feeding microbes electricity to convert carbon dioxide and water to  
382 multicarbon extracellular organic compounds. mBio 1:e00103-10.

36. Faraghiparapari N, Zengler K. 2017. Production of organics from CO<sub>2</sub> by microbial electrosynthesis (MES) at high temperature. *Journal of Chemical Technology and Biotechnology* 92:375-381.
37. Philips J, Monballyu E, Georg S, De Paepe K, PrévotEAU A, Rabaey K, Arends JB. 2018. An *Acetobacterium* strain isolated with metallic iron as electron donor enhances iron corrosion by a similar mechanism as *Sporomusa sphaeroides*. *FEMS microbiology ecology* 95:fiy222.
38. Eid MM, Duncan KE, Tanner RS. 2018. A semi-continuous system for monitoring microbially influenced corrosion. *Journal of microbiological methods* 150:55-60.
39. Müller V, Chowdhury NP, Basen M. 2018. Electron bifurcation: A long-hidden energy-coupling mechanism. *Annual Review of Microbiology* 72:331-353.
40. Schlegel K, Müller V. 2013. Evolution of Na<sup>+</sup> and H<sup>+</sup> bioenergetics in methanogenic archaea. *Biochemical Society Transactions* 41:421-426.
41. Drake HL, Küsel K, Matthies C. 2006. Acetogenic Prokaryotes, p 354-420. *In* Dworkin M, Falkow S, Rosenberg E, Schleifer K-H, Stackebrandt E (ed), *The Prokaryotes: Volume 2: Ecophysiology and Biochemistry* doi:10.1007/0-387-30742-7\_13. Springer New York, New York, NY.
42. Usher K, Kaksonen A, MacLeod I. 2014. Marine rust tubercles harbour iron corroding archaea and sulphate reducing bacteria. *Corrosion Science* 83:189-197.
43. Islam S, Karr EA. 2013. Examination of metal corrosion by *Desulfomicrobium thermophilum*, *Archaeoglobus fulgidus*, and *Methanothermobacter thermautotrophicus*. *Bio One* 84:59-65.
44. Phelps T, Conrad R, Zeikus J. 1985. Sulfate-dependent interspecies H<sub>2</sub> transfer between *Methanosarcina barkeri* and *Desulfovibrio vulgaris* during coculture metabolism of acetate or methanol. *Applied and Environmental Microbiology* 50:589-594.
45. Ozuolmez D, Na H, Lever MA, Kjeldsen KU, Jørgensen BB, Plugge CM. 2015. Methanogenic archaea and sulfate reducing bacteria co-cultured on acetate: teamwork or coexistence? *Frontiers in microbiology* 6:492.
46. Cheng L, Dai L, Li X, Zhang H, Lu Y. 2011. Isolation and characterization of *Methanothermobacter crinale* sp. nov., a novel hydrogenotrophic methanogen from the Shengli oil field. *Applied and Environmental Microbiology* 77:5212-5219.
47. Zhou Z, Meng Q, Yu Z. 2011. Effects of methanogenic inhibitors on methane production and abundances of methanogens and cellulolytic bacteria in in vitro ruminal cultures. *Applied and Environmental Microbiology* 77:2634-2639.
48. Meyer F, Paarmann D, D'Souza M, Olson R, Glass EM, Kubal M, Paczian T, Rodriguez A, Stevens R, Wilke A. 2008. The metagenomics RAST server—a public resource for the



418 automatic phylogenetic and functional analysis of metagenomes. BMC bioinformatics  
419 9:386.

420 49. Tatusova T, Ciufo S, Federhen S, Fedorov B, McVeigh R, O'Neill K, Tolstoy I, Zaslavsky L.  
421 2014. Update on RefSeq microbial genomes resources. Nucleic acids research 43:D599-  
422 D605.

423 50. Enning D, Garrelfs J. 2014. Corrosion of iron by sulfate-reducing bacteria: new views of an  
424 old problem. Applied and Environmental Microbiology 80:1226-1236.

425 51. Araujo JC, Téran FC, Oliveira RA, Nour EA, Montenegro MA, Campos JR, Vazoller RF.  
426 2003. Comparison of hexamethyldisilazane and critical point drying treatments for SEM  
427 analysis of anaerobic biofilms and granular sludge. Journal of electron microscopy 52:429-  
428 433.

429



## Figures

**Fig. 1.** The sampling site located in an urban construction area on the island of Fyn, Denmark (upper panel) is a small lake near the university of Southern Denmark (lower panel). Anoxic lake sediment was sampled with push cores during the summer of 2017, when ebullition due to increased methanogenesis is commonly observed.

**Fig. 1**

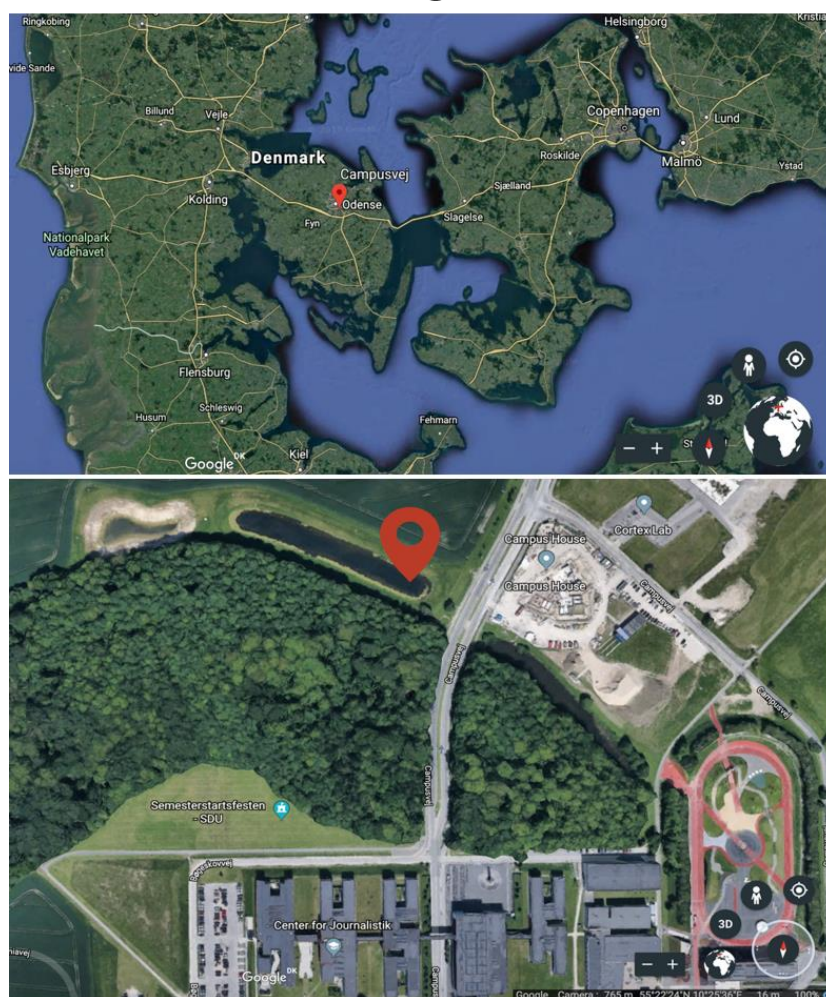

**Fig. 2.** Corrosion of  $\text{Fe}^0$  by a microbial community (4<sup>th</sup> successive transfer on  $\text{Fe}^0$ ) as determined by weight loss determination (a). Inhibition experiments revealed that acetogens were more corrosive than the mixed community, whereas methanogens were as corrosive alone as within the mixed community (a). (b) Visual observations of the  $\text{Fe}^0$ -surface after exposure to a corrosive community for 5 months. Removal of the black crust revealed changes in surface roughness. (c) Scanning electron microscopy of a mixed community after 5 months of incubation reveals cells are attached to the  $\text{Fe}^0$ -surface.

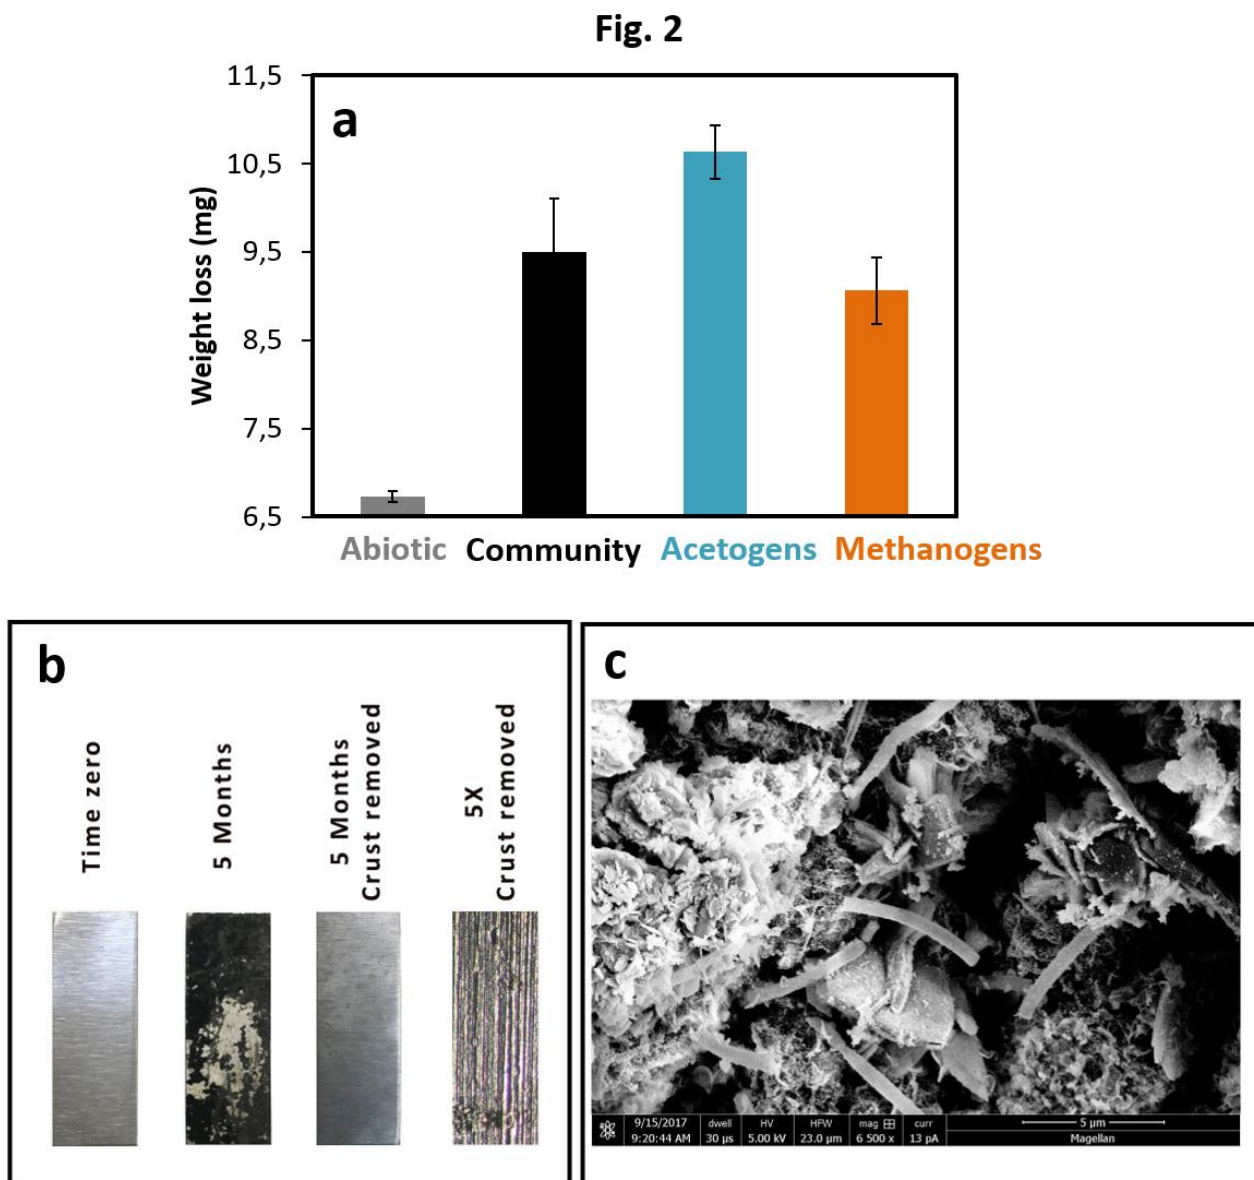

**Fig. 3.** Product formation using  $\text{Fe}^0$  as sole electron donor. (a) An abiotic control which includes  $\text{Fe}^0$  exposed to the culture medium containing bicarbonate, will build up  $\text{H}_2$  in the absence of cells. From abiotic  $\text{H}_2$  microorganisms could use four mols  $\text{H}_2$  to produce a mol of products (acetate or methane) according to reactions 3 and 4. (b) A mixed community after four successive transfers solely with  $\text{Fe}^0$  as electron donor, generated successively acetate with very high rates and later methane with similarly high rates. The products generated could not be explained solely by abiotic- $\text{H}_2$  (c) Acetogens were even more effective alone during the first month of incubation. The amount of acetate they produced could not be explained by abiotic- $\text{H}_2$ . (d) Methanogens alone although as corrosive as the mixed community, they were not as effective at producing methane as they were within the mixed community. (e) Total products as mM electron equivalents (eeq) produced on  $\text{Fe}^0$  under four different conditions. The following values are considered for each product: 2 mM eeq per mol  $\text{H}_2$ , 8 mM eeq for each mol of methane or acetate (see reactions 3 and 4). All experiments are run in triplicates ( $n=3$ ). When error bars are not shown they were smaller than the symbols.

**Fig. 3**

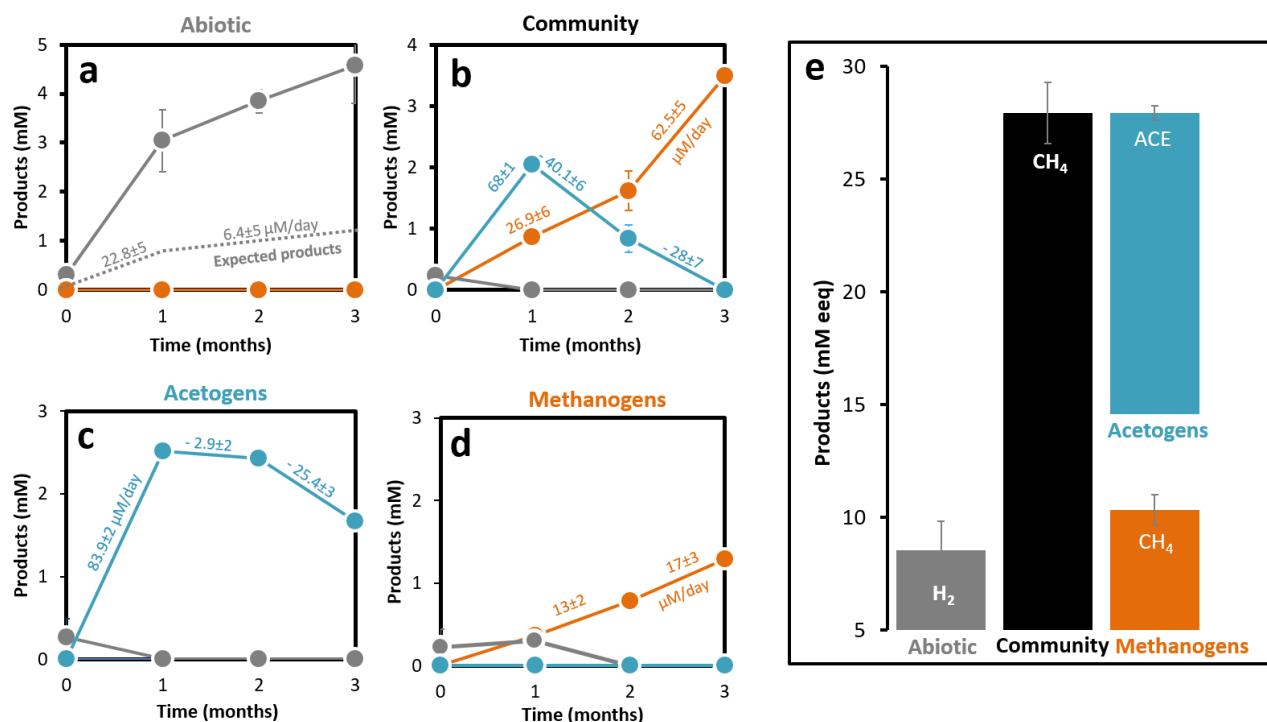

**Fig. 4.** Whole genome sequence distribution for (a) bacterial and (b) archaeal genera representing a corrosive community enriched on Fe<sup>0</sup> after four subsequent transfers.

**Fig. 4**

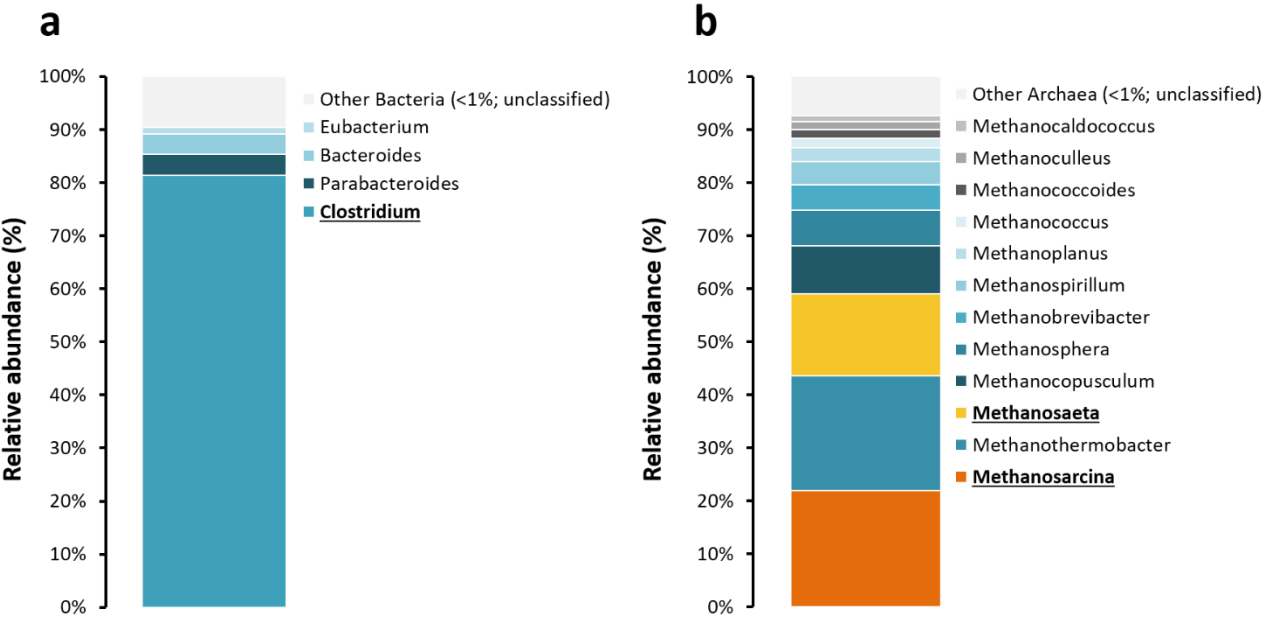

**Fig. 5.** Representative enzymes of the Wood-Ljungdahl pathway discovered in the metagenome of *Clostridia* from an Fe<sup>0</sup>-corrosive community enriched from an urban lake. The numbers are shown in red. ND means not detected.

**Fig. 5**

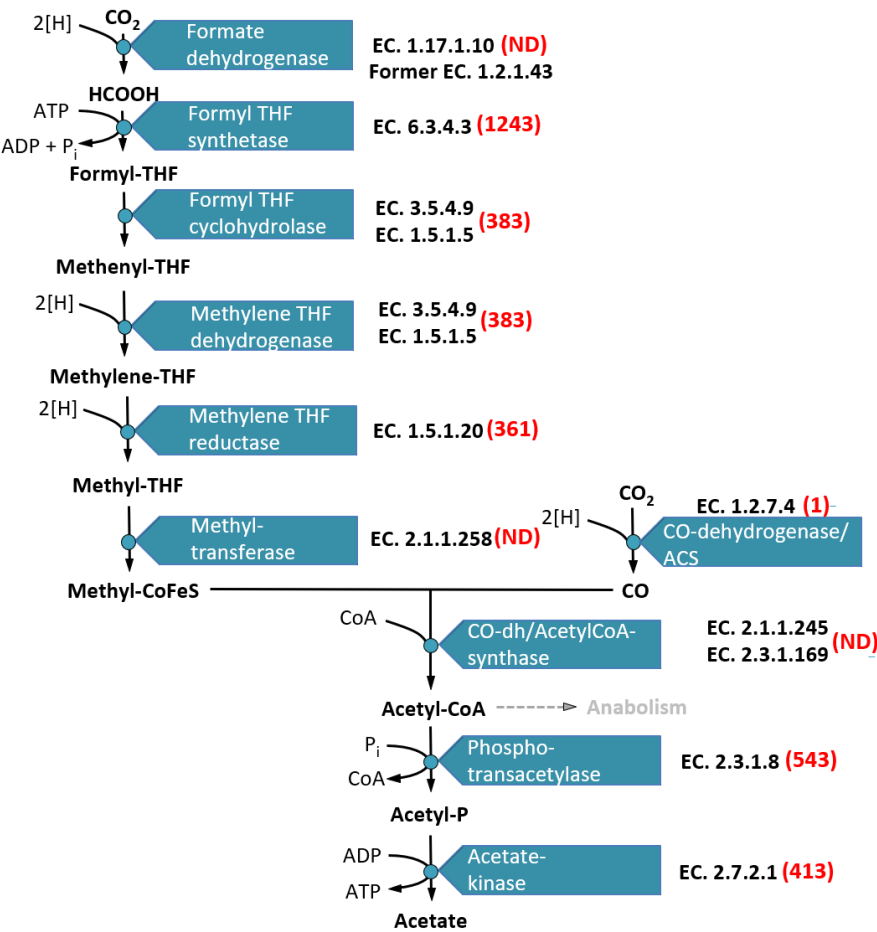

**Fig. 6.** Modeled interactions between *Clostridium*-acetogens with acetoclastic *Methanosarcinales* and hydrogenotrophic methanogens during the acetogenic phase when acetate production was highest (a) and (b) during the methanogenesis phase when methane production was highest.

**Fig. 6**

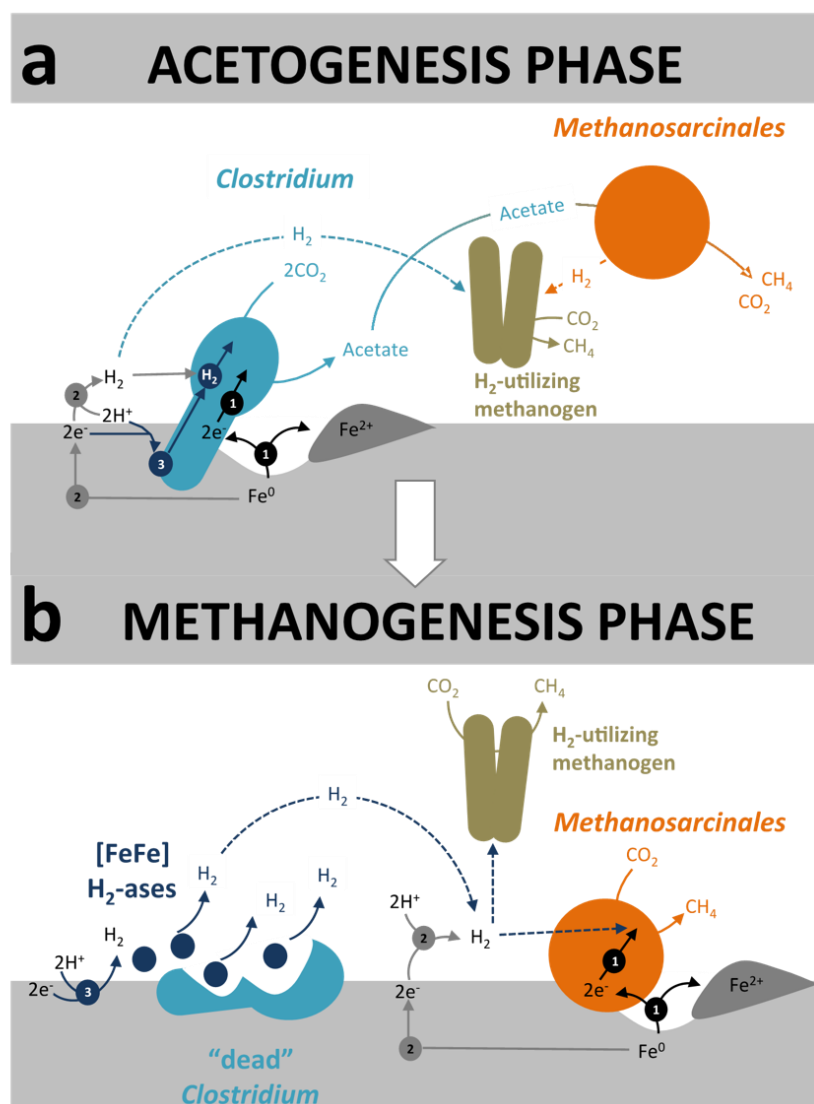

Source: https://www.biorxiv.org/content/early/2019/02/21/556704.full.pdf
